# Supplementary material for: MicroRNA 10a Marks Regulatory T Cells
Source: PLoS One. 2012 May 18;7(5):e36684. doi: 10.1371/journal.pone.0036684 (PMC3356350; doi:10.1371/journal.pone.0036684)
Supplement: Table S1 — Tconv and Treg miRNA expression signature. 300 ng total RNA was hybridized for Tconv and Treg to Exiqon MirCury V9.2 arrays. miRNA name (Column A), Fluorescence values of GFP- Tconv (Cy5) (Column B) and GFP+ Treg (Cy3) (column C). Fold fluorescence difference of Treg/Tconv (Column D). Background fluorescence, indicated as B635 and B532, was subtracted from total fluorescence for each spot on the slide. (XLS) [file pone.0036684.s004.xls]

## Sheet: Jeker_Suppl. Table 1
Jeker et al., Suppl. Table 1
	GFP- (Tconv) = Cy5 = red	GFP+ (Treg) = Cy3 = green
Name	F635 Median - B635	F532 Median - B532	fold difference	Log2 fold difference
mmu-miR-10a	9	339	37.6667	5.23522
mmu-miR-10a	12	274	22.8333	4.51307
mmu-miR-10a	12	253	21.0833	4.39803
mmu-miR-10a	20	270	13.5	3.75489
mmu-miR-125a-5p	151	480	3.17881	1.66849
mmu-miR-125a-5p	159	399	2.50943	1.32736
mmu-miR-125a-5p	154	372	2.41558	1.27237
mmu-miR-155	1090	2508	2.30092	1.20221
mmu-miR-155	1166	2654	2.27616	1.1866
mmu-miR-125a-5p	149	335	2.24832	1.16885
mmu-miR-155	1101	2412	2.19074	1.13142
mmu-miR-155	1039	2259	2.17421	1.12049
mmu-miR-21	5338	11574	2.16823	1.11652
mmu-miR-21	4908	9549	1.9456	0.960214
mmu-miR-21	5127	9875	1.92608	0.945666
mmu-miR-21	5413	10362	1.91428	0.936802
miRPlus_17869	629	1103	1.75358	0.810301
mmu-miR-677	148	251	1.69595	0.76209
mmu-miR-24	2028	3427	1.68984	0.756889
mmu-miR-24	1852	3026	1.63391	0.708328
mmu-miR-24	1901	3103	1.6323	0.706905
mmu-miR-27a	1834	2993	1.63195	0.706599
mmu-miR-184	206	333	1.6165	0.692878
mmu-miR-184	254	408	1.6063	0.683741
mmu-miR-27a	1733	2783	1.60589	0.683369
mmu-miR-677	136	217	1.59559	0.674088
mmu-miR-200b*	154	245	1.59091	0.669851
mmu-miR-184	193	304	1.57513	0.65547
miRPlus_17869	649	1021	1.57319	0.653692
miRPlus_17896	108	169	1.56481	0.645992
mmu-miR-27a	1764	2709	1.53571	0.61891
mmu-miR-184	230	352	1.53043	0.613942
mmu-miR-370	129	195	1.51163	0.596103
mmu-miR-146a	2743	4094	1.49253	0.577756
mmu-miR-23b	3456	5091	1.47309	0.558846
miRPlus_17869	610	885	1.45082	0.536868
miRPlus_17896	131	190	1.45038	0.536433
miRPlus_17869	654	948	1.44954	0.535596
mmu-miR-710	96	139	1.44792	0.533979
mmu-miR-23a	2480	3589	1.44718	0.533242
mmu-miR-677	138	198	1.43478	0.520832
mmu-miR-23a	2535	3626	1.43037	0.516393
mmu-miR-24	1826	2609	1.42881	0.51481
miRPlus_17890	380	542	1.42632	0.512293
mmu-miR-146a	2561	3649	1.42483	0.510794
mmu-miR-27b	1786	2529	1.41601	0.501835
mmu-miR-27a	1665	2357	1.41562	0.50143
mmu-miR-146a	2406	3404	1.4148	0.500594
mmu-miR-23a	2668	3765	1.41117	0.496891
mmu-miR-23b	3624	5112	1.4106	0.496305
mmu-miR-23b	3789	5303	1.39958	0.484992
miRPlus_17861	702	974	1.38746	0.472451
mmu-miR-27b	1995	2764	1.38546	0.470369
miRPlus_27564	198	274	1.38384	0.468675
miRPlus_17858	94	129	1.37234	0.456638
mmu-miR-370	151	206	1.36424	0.448096
miRPlus_17861	664	905	1.36295	0.446735
mmu-miR-669c	167	227	1.35928	0.442844
mmu-miR-27b	1910	2591	1.35654	0.439936
mmu-miR-370	169	228	1.34911	0.432011
miRPlus_17896	122	164	1.34426	0.426815
mmu-miR-200b*	161	214	1.32919	0.41055
mmu-miR-762	488	648	1.32787	0.409113
mmu-miR-370	162	215	1.32716	0.408343
mmu-miR-330*	97	128	1.31959	0.400087
miRPlus_17861	672	882	1.3125	0.392317
mmu-miR-669c	198	258	1.30303	0.381871
miRPlus_17858	100	130	1.3	0.378512
mmu-miR-214	107	139	1.29907	0.377474
miRPlus_17952	285	370	1.29825	0.376563
mmu-miR-214	115	149	1.29565	0.373678
mmu-miR-146b	2357	3047	1.29275	0.370438
mmu-miR-677	148	191	1.29054	0.367975
mmu-miR-501-3p	100	129	1.29	0.367371
mmu-miR-762	490	631	1.28776	0.364858
mmu-miR-185	683	879	1.28697	0.363978
mmu-miR-762	474	609	1.28481	0.361555
mmu-miR-146a	2550	3258	1.27765	0.353489
mmu-miR-762	478	609	1.27406	0.349432
mmu-miR-23b	3466	4404	1.27063	0.345543
mmu-miR-468	186	235	1.26344	0.337358
mmu-miR-185	666	829	1.24474	0.31585
mmu-miR-146b	2259	2807	1.24259	0.313345
mmu-miR-185	690	857	1.24203	0.312699
mmu-miR-27b	1724	2120	1.2297	0.298304
mmu-miR-23a	2473	3033	1.22645	0.294483
mmu-miR-214	129	157	1.21705	0.283393
mmu-miR-22	625	757	1.2112	0.276437
miRPlus_17896	139	167	1.20144	0.264763
mmu-miR-22	581	698	1.20138	0.264689
miRPlus_17890	436	517	1.18578	0.245836
mmu-miR-685	260	308	1.18462	0.244419
mmu-miR-22	699	827	1.18312	0.242595
miRPlus_17952	289	340	1.17647	0.234465
mmu-miR-706	443	520	1.17381	0.231205
miRPlus_17952	289	339	1.17301	0.230216
mmu-miR-146b	2176	2539	1.16682	0.222582
mmu-miR-468	204	235	1.15196	0.204092
miRPlus_17832	194	222	1.14433	0.194503
miRPlus_17865	195	223	1.14359	0.19357
mmu-miR-669c	186	212	1.13978	0.188762
mmu-miR-200b*	164	186	1.13415	0.181607
miRPlus_27564	225	253	1.12444	0.169212
mmu-miR-706	461	516	1.11931	0.162604
miRPlus_17858	109	122	1.11927	0.162553
mmu-miR-501-3p	109	122	1.11927	0.162553
mmu-miR-15b	17910	19919	1.11217	0.15338
mmu-miR-185	790	877	1.11013	0.150724
miRPlus_17861	668	740	1.10778	0.147677
miRPlus_17858	107	118	1.1028	0.141176
mmu-miR-329	182	200	1.0989	0.136062
miRPlus_28575	94	103	1.09574	0.131912
mmu-miR-710	95	104	1.09474	0.130584
mmu-miR-706	427	465	1.08899	0.122995
mmu-miR-17*	222	241	1.08559	0.118473
mmu-miR-206	95	103	1.08421	0.116645
miRPlus_17890	424	459	1.08255	0.11443
mmu-miR-669c	179	193	1.07821	0.108641
mmu-miR-714	90	97	1.07778	0.10806
mmu-miR-500	92	99	1.07609	0.105795
mmu-miR-22	633	681	1.07583	0.105449
mmu-miR-706	424	456	1.07547	0.10497
mmu-miR-326	365	391	1.07123	0.0992721
miRPlus_17832	186	199	1.06989	0.0974658
mmu-miR-17*	233	249	1.06867	0.0958158
mmu-miR-326	380	406	1.06842	0.0954803
mmu-miR-326	339	362	1.06785	0.0947044
mmu-miR-326	297	317	1.06734	0.0940199
mmu-miR-146b	2271	2422	1.06649	0.0928712
miRPlus_17890	491	522	1.06314	0.0883268
mmu-miR-468	183	194	1.06011	0.084213
mmu-miR-685	269	285	1.05948	0.0833557
mmu-miR-200b*	186	196	1.05376	0.075551
mmu-miR-770-3p	95	100	1.05263	0.0740006
mmu-miR-29a	37716	39641	1.05104	0.0718167
miRPlus_17847	155	162	1.04516	0.0637256
mmu-miR-685	257	268	1.0428	0.0604646
mmu-miR-674	118	123	1.04237	0.0598715
mmu-miR-710	122	127	1.04098	0.0579473
mmu-miR-669a	138	143	1.03623	0.0513469
miRPlus_27564	238	246	1.03361	0.0476967
mmu-miR-452	290	296	1.02069	0.0295443
mmu-miR-668	4515	4601	1.01905	0.0272215
mmu-miR-669a	132	134	1.01515	0.0216951
mmu-miR-500	95	96	1.01053	0.0151069
mmu-miR-452	242	244	1.00826	0.0118741
mmu-miR-15b	15919	16027	1.00678	0.00975469
mmu-miR-468	199	200	1.00503	0.00723157
miRPlus_17952	329	330	1.00304	0.00437844
mmu-miR-714	99	99	1	0
mmu-miR-674	123	122	0.99187	-0.0117772
mmu-miR-99b	97	96	0.989691	-0.0149503
mmu-miR-15b	14095	13873	0.98425	-0.0229037
mmu-miR-29a	33872	33323	0.983792	-0.0235749
mmu-miR-330*	100	98	0.98	-0.0291463
mmu-miR-15b	14721	14415	0.979213	-0.0303048
mmu-miR-298	2549	2488	0.976069	-0.0349449
mmu-miR-301a	165	161	0.975758	-0.0354053
mmu-miR-452	246	240	0.97561	-0.0356239
miRPlus_17832	217	211	0.97235	-0.040452
mmu-miR-29a	33249	32113	0.965834	-0.0501535
mmu-miR-330*	112	108	0.964286	-0.0524674
mmu-miR-17*	217	209	0.963134	-0.0541921
mmu-miR-214	133	127	0.954887	-0.0665977
miRPlus_21472	153	146	0.954248	-0.0675633
miRPlus_28575	93	88	0.946237	-0.0797272
mmu-miR-685	277	262	0.945848	-0.0803192
miRPlus_17832	205	193	0.941463	-0.0870231
mmu-miR-668	4893	4600	0.940119	-0.0890854
mmu-miR-17*	265	248	0.935849	-0.0956522
miRPlus_17955	92	86	0.934783	-0.0972972
mmu-miR-329	202	188	0.930693	-0.103623
mmu-miR-684	155	144	0.929032	-0.106199
mmu-let-7e	308	286	0.928571	-0.106915
mmu-let-7g	1123	1028	0.915405	-0.127518
mmu-miR-191	1773	1622	0.914834	-0.128419
miRPlus_17833	92	84	0.913043	-0.131245
mmu-miR-500	98	89	0.908163	-0.138976
mmu-miR-129-5p	261	236	0.904215	-0.145263
miRPlus_17865	245	221	0.902041	-0.148735
mmu-miR-130b	183	165	0.901639	-0.149378
mmu-miR-684	170	153	0.9	-0.152003
mmu-miR-16	28623	25756	0.899836	-0.152266
mmu-miR-16	29398	26415	0.898531	-0.154361
mmu-miR-329	200	179	0.895	-0.16004
mmu-miR-16	31410	28067	0.893569	-0.162349
mmu-miR-363	129	115	0.891473	-0.165737
mmu-miR-668	4269	3802	0.890607	-0.16714
mmu-miR-298	2575	2292	0.890097	-0.167965
mmu-miR-92b	139	123	0.884892	-0.176427
miRPlus_17955	91	80	0.879121	-0.185867
mmu-miR-363	155	136	0.877419	-0.188662
mmu-miR-500	106	93	0.877358	-0.188762
mmu-miR-674	121	106	0.876033	-0.190943
mmu-miR-298	2661	2331	0.875986	-0.19102
miRPlus_21472	173	151	0.872832	-0.196223
mmu-miR-501-3p	121	105	0.867769	-0.204618
mmu-miR-92b	135	117	0.866667	-0.206451
miRPlus_27564	267	231	0.865169	-0.208947
mmu-let-7g	1005	868	0.863682	-0.211429
mmu-let-7g*	123	106	0.861789	-0.214594
mmu-miR-678	650	554	0.852308	-0.230554
miRPlus_21472	168	143	0.85119	-0.232446
mmu-miR-29a	31570	26711	0.846088	-0.24112
mmu-miR-380-3p	206	174	0.84466	-0.243557
mmu-miR-329	178	149	0.837079	-0.256565
mmu-miR-363	158	132	0.835443	-0.259387
mmu-miR-130b	182	152	0.835165	-0.259867
mmu-miR-668	4665	3894	0.834727	-0.260624
mmu-miR-191	2105	1757	0.834679	-0.260706
miRPlus_27561	427	356	0.833724	-0.262359
miRPlus_17955	102	85	0.833333	-0.263034
mmu-miR-718	156	130	0.833333	-0.263034
mmu-miR-106b	5358	4461	0.832587	-0.264327
miRPlus_27561	430	358	0.832558	-0.264377
mmu-miR-191	2097	1742	0.830711	-0.267582
mmu-miR-380-3p	254	211	0.830709	-0.267585
mmu-miR-191	1900	1578	0.830526	-0.267902
mmu-miR-718	159	132	0.830189	-0.268489
mmu-miR-106b	4946	4100	0.828953	-0.270638
mmu-miR-669a	159	131	0.823899	-0.27946
mmu-miR-669a	147	121	0.823129	-0.280809
mmu-let-7g	1024	842	0.822266	-0.282324
mmu-miR-467b*	661	543	0.821483	-0.283698
mmu-miR-129-5p	294	241	0.819728	-0.286783
mmu-let-7e	354	290	0.819209	-0.287696
mmu-miR-320	6863	5619	0.818738	-0.288526
mmu-let-7g*	131	107	0.816794	-0.291956
mmu-miR-129-5p	314	256	0.815287	-0.294621
mmu-miR-381	144	117	0.8125	-0.29956
mmu-miR-29b	4114	3342	0.812348	-0.29983
mmu-miR-29b	3949	3201	0.810585	-0.302965
mmu-miR-25	120	97	0.808333	-0.306978
mmu-let-7i	1304	1054	0.808282	-0.307069
mmu-miR-29b	4160	3362	0.808173	-0.307264
mmu-miR-30e*	177	143	0.80791	-0.307734
mmu-miR-203	181	146	0.80663	-0.310021
mmu-miR-425	185	149	0.805405	-0.312213
mmu-miR-805	255	205	0.803922	-0.314873
mmu-miR-298	2723	2189	0.803893	-0.314925
mmu-miR-713	264	212	0.80303	-0.316474
mmu-miR-801	977	784	0.802456	-0.317505
mmu-miR-709	65475	52520	0.802138	-0.318077
mmu-miR-423-5p	722	579	0.801939	-0.318435
mmu-miR-715	130	104	0.8	-0.321928
miRPlus_17833	94	75	0.797872	-0.32577
mmu-miR-801	1043	832	0.797699	-0.326084
mmu-miR-494	4664	3700	0.79331	-0.334043
mmu-miR-320	6362	5047	0.793304	-0.334054
mmu-let-7e	324	257	0.79321	-0.334225
mmu-miR-501-3p	116	92	0.793103	-0.334419
miRPlus_28575	100	79	0.79	-0.340075
mmu-miR-296-5p	347	274	0.789625	-0.34076
mmu-miR-484	346	273	0.789017	-0.341871
miRPlus_27561	453	357	0.788079	-0.343587
mmu-miR-380-3p	198	156	0.787879	-0.343954
mmu-miR-16	27528	21643	0.786218	-0.346999
mmu-miR-713	237	186	0.78481	-0.349584
mmu-miR-423-5p	604	474	0.784768	-0.349661
mmu-miR-691	2646	2076	0.78458	-0.350007
mmu-miR-29b	4111	3217	0.782535	-0.353773
mmu-miR-106b	5265	4119	0.782336	-0.354139
mmu-let-7g*	151	118	0.781457	-0.355762
mmu-let-7e	361	282	0.781163	-0.356304
mmu-miR-320	6028	4707	0.780856	-0.356872
miRPlus_21472	158	123	0.778481	-0.361266
mmu-miR-805	292	227	0.777397	-0.363276
mmu-miR-195	408	317	0.776961	-0.364086
mmu-miR-130b	222	171	0.77027	-0.376563
mmu-miR-709	65480	50231	0.76712	-0.382476
miRPlus_17865	248	190	0.766129	-0.384341
mmu-miR-345-5p	94	72	0.765957	-0.384664
mmu-miR-684	187	143	0.764706	-0.387023
mmu-miR-423-3p	93	71	0.763441	-0.389412
mmu-let-7i	1236	942	0.762136	-0.39188
mmu-miR-338-5p	105	80	0.761905	-0.392317
mmu-miR-129-3p	176	134	0.761364	-0.393342
mmu-miR-434-3p	293	223	0.761092	-0.393857
miRPlus_17833	100	76	0.76	-0.395929
mmu-let-7g*	133	101	0.759398	-0.397071
mmu-miR-320	4870	3696	0.758932	-0.397957
mmu-miR-301a	174	132	0.758621	-0.398549
mmu-miR-467b*	630	477	0.757143	-0.401363
miRPlus_28575	111	84	0.756757	-0.402098
mmu-miR-301a	168	127	0.755952	-0.403633
miRPlus_27561	417	315	0.755396	-0.404696
mmu-miR-678	677	511	0.754801	-0.405833
mmu-miR-103	520	389	0.748077	-0.418741
mmu-miR-346	103	77	0.747573	-0.419714
mmu-miR-345-5p	99	74	0.747475	-0.419903
mmu-miR-718	182	136	0.747253	-0.420332
mmu-miR-691	2685	2001	0.745251	-0.424201
mmu-miR-30e*	239	178	0.74477	-0.425133
mmu-miR-690	42133	31239	0.741438	-0.431602
mmu-miR-709	65480	48441	0.739783	-0.434826
mmu-miR-691	2619	1936	0.739213	-0.435937
mmu-miR-452	283	209	0.738516	-0.437299
mmu-miR-678	696	514	0.738506	-0.437319
mmu-miR-467b*	662	488	0.73716	-0.43995
mmu-miR-801	1078	794	0.736549	-0.441146
mmu-let-7i	1257	923	0.734288	-0.445582
mmu-let-7g	1001	734	0.733267	-0.44759
mmu-miR-18a	324	237	0.731481	-0.451107
mmu-miR-678	698	510	0.730659	-0.45273
mmu-miR-690	42842	31299	0.730568	-0.452909
mmu-miR-340-5p	374	273	0.729947	-0.454137
mmu-miR-805	285	208	0.729825	-0.454378
mmu-miR-690	43733	31866	0.728649	-0.456704
mmu-miR-203	172	125	0.726744	-0.46048
miRPlus_11201	1700	1232	0.724706	-0.464532
miRPlus_11201	1639	1179	0.719341	-0.475252
mmu-miR-363	149	107	0.718121	-0.477702
mmu-miR-19a	1818	1299	0.714521	-0.484951
mmu-miR-715	125	89	0.712	-0.490051
mmu-miR-140	445	316	0.710112	-0.493881
mmu-miR-805	258	183	0.709302	-0.495527
mmu-miR-106b*	106	75	0.707547	-0.499102
miRPlus_11201	1714	1212	0.707118	-0.499977
mmu-miR-801	1003	707	0.704885	-0.504539
mmu-miR-434-3p	311	219	0.70418	-0.505984
mmu-miR-744	162	114	0.703704	-0.50696
mmu-miR-30e*	202	142	0.70297	-0.508464
miRPlus_27560	107	75	0.700935	-0.512648
mmu-miR-346	107	75	0.700935	-0.512648
mmu-miR-423-3p	110	77	0.7	-0.514573
mmu-miR-709	65479	45681	0.697644	-0.519438
miRPlus_17865	287	200	0.696864	-0.521051
mmu-miR-129-5p	297	206	0.693603	-0.527819
mmu-miR-25	140	97	0.692857	-0.52937
mmu-miR-340-5p	397	275	0.692695	-0.529707
mmu-miR-711	6122	4240	0.692584	-0.529939
mmu-miR-494	4964	3437	0.692385	-0.530353
mmu-miR-425	214	148	0.691589	-0.532014
mmu-miR-425	226	156	0.690265	-0.534777
mmu-miR-92b	174	120	0.689655	-0.536053
mmu-miR-340-5p	409	282	0.689487	-0.536406
mmu-miR-129-3p	177	122	0.689266	-0.536868
mmu-miR-484	360	248	0.688889	-0.537657
mmu-miR-744	141	97	0.687943	-0.539639
mmu-miR-423-5p	574	394	0.686411	-0.542855
mmu-miR-374	358	245	0.684358	-0.547178
mmu-miR-615-3p	100	68	0.68	-0.556393
mmu-miR-296-5p	381	259	0.67979	-0.556839
mmu-miR-18a	318	216	0.679245	-0.557995
mmu-miR-129-3p	205	139	0.678049	-0.560539
mmu-miR-130a	96	65	0.677083	-0.562595
mmu-miR-674	151	102	0.675497	-0.565979
mmu-miR-711	6217	4197	0.675084	-0.56686
mmu-miR-361	1089	733	0.673095	-0.571119
mmu-miR-129-3p	180	121	0.672222	-0.57299
mmu-miR-19a	2341	1573	0.671935	-0.573606
miRPlus_17880	155	104	0.670968	-0.575685
mmu-miR-423-5p	629	422	0.670906	-0.575817
mmu-miR-25	164	110	0.670732	-0.576192
mmu-miR-19a	2276	1522	0.668717	-0.580532
mmu-miR-148b	181	121	0.668508	-0.580983
mmu-miR-324-3p	190	127	0.668421	-0.581171
mmu-miR-140	428	286	0.668224	-0.581596
mmu-miR-711	6287	4201	0.668204	-0.581639
mmu-miR-29c	821	548	0.667479	-0.583206
mmu-miR-92b	153	102	0.666667	-0.584963
mmu-miR-380-3p	251	167	0.665339	-0.587839
mmu-miR-433*	385	256	0.664935	-0.588715
mmu-miR-684	167	111	0.664671	-0.589288
mmu-miR-690	41826	27782	0.664228	-0.59025
mmu-miR-92a	790	524	0.663291	-0.592286
mmu-miR-346	98	65	0.663265	-0.592342
mmu-miR-374*	193	128	0.663212	-0.592457
mmu-miR-374	376	249	0.662234	-0.594587
miRPlus_17930	139	92	0.661871	-0.595379
mmu-miR-691	2661	1758	0.660654	-0.598033
mmu-miR-715	159	105	0.660377	-0.598637
mmu-miR-148b	203	134	0.660099	-0.599247
mmu-miR-434-3p	297	196	0.659933	-0.599609
mmu-miR-106b	4906	3237	0.659804	-0.59989
mmu-miR-340-5p	408	269	0.659314	-0.600963
mmu-miR-713	275	181	0.658182	-0.603442
mmu-miR-18a	333	219	0.657658	-0.604591
mmu-miR-7a	616	405	0.657468	-0.605008
mmu-miR-130b	216	142	0.657407	-0.60514
mmu-miR-195	398	261	0.655779	-0.608719
mmu-miR-301a	180	118	0.655556	-0.60921
miRPlus_11201	1593	1043	0.654739	-0.611007
mmu-miR-19a	2340	1532	0.654701	-0.611092
mmu-miR-338-5p	95	62	0.652632	-0.615659
mmu-miR-711	6276	4092	0.652008	-0.617039
mmu-miR-494	5006	3262	0.651618	-0.617902
mmu-miR-106b*	108	70	0.648148	-0.625604
mmu-miR-351	411	266	0.647202	-0.627712
mmu-miR-148b	203	131	0.64532	-0.631913
mmu-miR-494	5206	3352	0.643872	-0.635153
mmu-miR-296-5p	402	258	0.641791	-0.639824
mmu-miR-325*	92	59	0.641304	-0.640919
mmu-miR-718	181	116	0.640884	-0.641865
mmu-miR-195	398	255	0.640704	-0.642271
mmu-miR-324-3p	192	123	0.640625	-0.642448
mmu-miR-296-5p	416	266	0.639423	-0.645157
mmu-miR-103	548	350	0.638686	-0.646821
mmu-miR-466d-3p_MM1	586	374	0.638225	-0.647862
mmu-miR-103	538	343	0.637546	-0.649398
mmu-miR-203	184	117	0.63587	-0.653197
mmu-miR-381	167	106	0.634731	-0.655784
mmu-miR-19b	5478	3473	0.633991	-0.657467
mmu-miR-19b	5130	3249	0.633333	-0.658963
mmu-miR-484	333	210	0.630631	-0.665133
miRPlus_27560	92	58	0.630435	-0.665581
mmu-miR-140	439	276	0.628702	-0.669553
miRPlus_27560	113	71	0.628319	-0.670432
mmu-miR-467b*	622	390	0.62701	-0.67344
mmu-miR-148b	193	121	0.626943	-0.673594
mmu-miR-485*	115	72	0.626087	-0.675565
mmu-miR-712*	179	112	0.625698	-0.676461
mmu-miR-29c	838	524	0.625298	-0.677383
mmu-miR-107	514	321	0.624514	-0.679195
mmu-miR-324-3p	173	108	0.624277	-0.679741
mmu-miR-107	516	322	0.624031	-0.68031
mmu-miR-434-3p	343	214	0.623907	-0.680598
mmu-miR-484	371	231	0.622642	-0.683526
mmu-miR-125b-3p	140	87	0.621429	-0.68634
mmu-miR-433*	366	227	0.620219	-0.689151
mmu-miR-98	608	377	0.620066	-0.689507
mmu-miR-744	118	73	0.618644	-0.692818
mmu-miR-425	178	110	0.617978	-0.694374
mmu-miR-18a	301	186	0.61794	-0.694461
mmu-miR-92a	778	480	0.616967	-0.696736
miRPlus_17833	117	72	0.615385	-0.70044
mmu-miR-203	202	124	0.613861	-0.704015
mmu-miR-98	609	373	0.612479	-0.707267
mmu-miR-466d-3p_MM1	526	322	0.612167	-0.708002
mmu-miR-29c	928	567	0.610991	-0.710776
mmu-miR-106a	2048	1245	0.60791	-0.71807
mmu-miR-713	255	155	0.607843	-0.718229
mmu-miR-19b	5484	3323	0.605945	-0.722742
mmu-miR-140	383	232	0.605744	-0.72322
mmu-let-7i	1106	668	0.603978	-0.727431
miRPlus_17930	171	103	0.602339	-0.731352
mmu-miR-30d	3846	2313	0.601404	-0.733593
mmu-miR-92a	685	411	0.6	-0.736966
mmu-miR-142-3p	65481	39136	0.59767	-0.74258
mmu-miR-101a	1468	875	0.596049	-0.746497
mmu-miR-101a	1486	885	0.595559	-0.747685
mmu-miR-423-3p	113	67	0.59292	-0.75409
mmu-miR-361	1110	658	0.592793	-0.7544
mmu-miR-98	631	374	0.59271	-0.754602
mmu-miR-106a	2105	1243	0.590499	-0.759994
mmu-miR-489	156	92	0.589744	-0.76184
mmu-miR-142-3p	65479	38475	0.587593	-0.767111
mmu-miR-744	109	64	0.587156	-0.768184
mmu-miR-92a	780	457	0.585897	-0.77128
mmu-miR-98	579	339	0.585492	-0.772278
mmu-miR-107	509	298	0.585462	-0.772353
mmu-let-7f	405	237	0.585185	-0.773035
mmu-miR-124	94	55	0.585106	-0.773229
mmu-miR-715	137	80	0.583942	-0.776104
mmu-miR-361	974	568	0.583162	-0.778031
mmu-miR-20a	6619	3857	0.582716	-0.779134
mmu-miR-675-5p	242	141	0.582645	-0.779312
mmu-miR-421	91	53	0.582418	-0.779874
mmu-miR-374	368	214	0.581522	-0.782095
mmu-miR-106a	2113	1228	0.581164	-0.782982
mmu-miR-671-5p	100	58	0.58	-0.785875
mmu-miR-7a	640	371	0.579688	-0.786653
mmu-miR-20a	7372	4260	0.577862	-0.791203
mmu-miR-361	1006	581	0.577535	-0.79202
mmu-miR-17	3441	1986	0.577158	-0.792962
mmu-miR-142-3p	65483	37792	0.577127	-0.79304
mmu-miR-201	92	53	0.576087	-0.795642
mmu-miR-466d-3p_MM1	528	304	0.575758	-0.796467
mmu-miR-125b-3p	120	69	0.575	-0.798366
mmu-miR-17	3505	2015	0.574893	-0.798635
mmu-miR-15a	4839	2781	0.574706	-0.799105
mmu-miR-207	394	226	0.573604	-0.801873
mmu-miR-466d-3p_MM1	530	304	0.573585	-0.801921
mmu-miR-7a*	103	59	0.572816	-0.803857
mmu-miR-103	517	296	0.572534	-0.804567
mmu-miR-101a	1546	883	0.571151	-0.808055
mmu-miR-101a	1527	872	0.571054	-0.8083
mmu-miR-20a	6642	3789	0.570461	-0.809801
mmu-miR-30e*	246	140	0.569106	-0.813231
mmu-miR-350	524	298	0.568702	-0.814254
mmu-miR-125b-3p	146	83	0.568493	-0.814785
mmu-miR-29c	835	473	0.566467	-0.819936
mmu-miR-7a	613	347	0.566069	-0.820951
mmu-miR-30d	3665	2068	0.564256	-0.825577
mmu-miR-19b	5513	3109	0.56394	-0.826387
mmu-miR-17	3469	1952	0.562698	-0.829567
mmu-miR-485*	123	69	0.560976	-0.83399
mmu-miR-207	385	215	0.558442	-0.840522
mmu-miR-324-3p	174	97	0.557471	-0.843031
mmu-miR-194	110	61	0.554545	-0.850622
mmu-miR-106a	1994	1104	0.553661	-0.852925
mmu-miR-675-5p	244	135	0.553279	-0.853922
mmu-miR-20b	2890	1596	0.552249	-0.856609
mmu-miR-30a	7105	3920	0.551724	-0.857981
mmu-miR-378	637	351	0.55102	-0.859822
mmu-miR-106b*	120	66	0.55	-0.862496
mmu-miR-712*	200	110	0.55	-0.862496
mmu-miR-374	379	208	0.548813	-0.865614
mmu-miR-17	3473	1906	0.548805	-0.865634
mmu-miR-25	164	90	0.54878	-0.865699
mmu-miR-195	432	237	0.548611	-0.866144
mmu-miR-712*	199	109	0.547739	-0.86844
mmu-miR-350	494	270	0.546559	-0.871552
mmu-miR-652	355	194	0.546479	-0.871762
mmu-miR-381	187	102	0.545455	-0.874469
mmu-miR-689	1164	634	0.544674	-0.876536
mmu-miR-93	1297	705	0.543562	-0.879483
mmu-miR-689	1168	630	0.539384	-0.890617
mmu-miR-32	508	274	0.53937	-0.890653
mmu-miR-30d	3394	1829	0.538892	-0.891931
mmu-miR-32	443	238	0.537246	-0.896345
mmu-miR-689	1092	586	0.53663	-0.898
mmu-miR-93	1270	680	0.535433	-0.901222
mmu-miR-20b	2667	1427	0.535058	-0.902232
mmu-miR-194	124	66	0.532258	-0.909802
mmu-miR-667	669	356	0.532138	-0.910129
mmu-miR-667	631	335	0.530903	-0.913479
mmu-miR-350	506	267	0.527668	-0.922298
mmu-let-7f	403	212	0.526055	-0.926716
mmu-miR-93	1217	640	0.525883	-0.927185
mmu-miR-7a*	137	72	0.525547	-0.928107
mmu-miR-188-5p	99	52	0.525253	-0.928917
mmu-miR-351	490	257	0.52449	-0.931013
mmu-let-7a	24452	12814	0.524047	-0.932232
mmu-miR-26a_MM1	5399	2825	0.523245	-0.934441
mmu-miR-423-3p	109	57	0.522936	-0.935294
mmu-miR-350	593	310	0.522766	-0.935764
mmu-miR-744	178	93	0.522472	-0.936575
mmu-miR-532-5p	98	51	0.520408	-0.942285
mmu-let-7d	12902	6709	0.519997	-0.943425
mmu-miR-207	404	210	0.519802	-0.943966
mmu-miR-485*	108	56	0.518519	-0.947533
mmu-miR-142-3p	65481	33889	0.517539	-0.950259
mmu-miR-26a	6684	3448	0.515859	-0.954952
mmu-miR-378	716	369	0.515363	-0.956339
mmu-miR-194	103	53	0.514563	-0.95858
mmu-let-7f	389	199	0.511568	-0.967002
mmu-miR-30d	3396	1730	0.509423	-0.973064
mmu-miR-26a_MM1	5230	2658	0.508222	-0.97647
mmu-miR-20a	6401	3243	0.50664	-0.980968
mmu-miR-744	192	97	0.505208	-0.98505
mmu-miR-675-5p	242	122	0.504132	-0.988126
mmu-miR-467a*/467d*	1160	583	0.502586	-0.992557
mmu-miR-429	94	47	0.5	-1
mmu-miR-20b	2632	1315	0.49962	-1.0011
mmu-miR-93	1340	669	0.499254	-1.00215
mmu-miR-207	440	219	0.497727	-1.00657
mmu-miR-378	644	320	0.496894	-1.00899
mmu-miR-30a	6806	3377	0.49618	-1.01106
mmu-miR-652	389	193	0.496144	-1.01117
mmu-miR-30a	6501	3224	0.495924	-1.01181
mmu-miR-485*	115	57	0.495652	-1.0126
mmu-miR-30e	5135	2543	0.495229	-1.01383
mmu-let-7a	22588	11131	0.492784	-1.02097
mmu-miR-712*	199	98	0.492462	-1.02191
mmu-miR-7a	798	392	0.491228	-1.02554
mmu-miR-15a	5131	2518	0.490743	-1.02696
mmu-miR-30e	4967	2432	0.489632	-1.03023
miRPlus_17920	96	47	0.489583	-1.03037
mmu-miR-351	491	240	0.488798	-1.03269
mmu-let-7a	22965	11216	0.488395	-1.03388
mmu-miR-107	519	253	0.487476	-1.0366
mmu-let-7a	28461	13819	0.485542	-1.04233
mmu-miR-433*	455	220	0.483516	-1.04836
mmu-miR-26a	9474	4572	0.482584	-1.05115
mmu-let-7d	12959	6251	0.482367	-1.0518
mmu-miR-720	919	443	0.482046	-1.05276
miRPlus_17930	160	77	0.48125	-1.05514
mmu-miR-30e	5244	2523	0.481121	-1.05553
mmu-miR-652	377	181	0.480106	-1.05857
mmu-miR-30c	9002	4298	0.477449	-1.06658
mmu-miR-15a	4348	2068	0.475621	-1.07212
mmu-miR-32	442	209	0.472851	-1.08054
mmu-miR-467a*/467d*	1094	516	0.471664	-1.08417
mmu-miR-186	104	49	0.471154	-1.08573
mmu-miR-26a_MM1	6093	2869	0.470868	-1.0866
mmu-miR-351	470	221	0.470213	-1.08861
mmu-miR-335-5p	100	47	0.47	-1.08927
mmu-let-7c	16698	7823	0.468499	-1.09388
mmu-miR-30c	8411	3932	0.467483	-1.09701
mmu-miR-215	92	43	0.467391	-1.0973
mmu-miR-339-5p	92	43	0.467391	-1.0973
mmu-miR-467a*/467d*	1071	500	0.466853	-1.09896
mmu-let-7b	7257	3386	0.466584	-1.09979
mmu-miR-700	491	229	0.466395	-1.10038
mmu-miR-125b-3p	181	84	0.464088	-1.10753
mmu-miR-700	552	256	0.463768	-1.10852
mmu-miR-615-3p	110	51	0.463636	-1.10893
mmu-miR-433*	434	201	0.463134	-1.1105
mmu-miR-221	93	43	0.462366	-1.11289
mmu-miR-345-5p	93	43	0.462366	-1.11289
mmu-miR-489	171	79	0.461988	-1.11407
mmu-miR-15a	4774	2205	0.461877	-1.11442
mmu-miR-30b	9136	4201	0.459829	-1.12083
mmu-miR-30c	8093	3717	0.459286	-1.12254
mmu-miR-20b	2715	1246	0.458932	-1.12365
mmu-miR-30a	6716	3069	0.456968	-1.12983
mmu-miR-720	982	448	0.456212	-1.13222
mmu-miR-342-3p	1379	627	0.454677	-1.13709
miRPlus_27560	110	50	0.454545	-1.1375
mmu-miR-652	425	193	0.454118	-1.13886
mmu-miR-26a_MM1	5610	2547	0.454011	-1.1392
mmu-miR-378*	97	44	0.453608	-1.14048
mmu-miR-700	488	220	0.45082	-1.14938
mmu-miR-181a	180	81	0.45	-1.152
mmu-miR-342-3p	1357	610	0.449521	-1.15354
mmu-miR-378	696	311	0.446839	-1.16217
mmu-miR-720	963	430	0.446521	-1.1632
mmu-miR-32	491	219	0.446029	-1.16479
mmu-let-7d	12192	5432	0.445538	-1.16638
mmu-let-7f	436	194	0.444954	-1.16827
mmu-miR-222	99	44	0.444444	-1.16993
mmu-miR-26a	9053	4015	0.443499	-1.173
mmu-miR-30e	4818	2134	0.442922	-1.17487
miRPlus_17930	215	95	0.44186	-1.17834
mmu-miR-667	672	296	0.440476	-1.18286
mmu-miR-30b	8503	3730	0.438669	-1.1888
mmu-miR-30b	9716	4251	0.437526	-1.19256
mmu-miR-26a	9388	4093	0.435982	-1.19766
mmu-let-7c	15344	6682	0.43548	-1.19932
mmu-let-7d	13572	5904	0.435013	-1.20087
mmu-miR-667	698	303	0.434097	-1.20391
mmu-miR-467a*/467d*	1012	439	0.433794	-1.20492
mmu-miR-675-5p	282	122	0.432624	-1.20881
mmu-miR-30c	8100	3491	0.430988	-1.21428
mmu-miR-151-5p	93	40	0.430108	-1.21723
miRPlus_17945	98	42	0.428571	-1.22239
mmu-miR-489	166	71	0.427711	-1.22529
mmu-let-7c	15544	6648	0.427689	-1.22537
mmu-miR-700	536	228	0.425373	-1.2332
mmu-miR-744	146	62	0.424658	-1.23563
mmu-miR-763	99	42	0.424242	-1.23704
mmu-miR-720	888	375	0.422297	-1.24367
mmu-miR-222	115	48	0.417391	-1.26053
mmu-miR-744	132	55	0.416667	-1.26303
mmu-let-7b	6734	2802	0.416097	-1.26501
mmu-miR-30b	8737	3631	0.415589	-1.26677
mmu-miR-142-5p	5924	2455	0.414416	-1.27085
mmu-miR-689	1239	512	0.413236	-1.27496
mmu-miR-682	92	38	0.413043	-1.27563
mmu-miR-142-5p	5780	2387	0.412976	-1.27587
mmu-miR-381	253	104	0.411067	-1.28255
mmu-miR-449a	95	39	0.410526	-1.28445
mmu-miR-377	91	37	0.406593	-1.29834
mmu-miR-142-5p	6026	2442	0.405244	-1.30314
mmu-miR-194	109	44	0.40367	-1.30875
mmu-miR-7a*	134	54	0.402985	-1.3112
mmu-miR-212	2396	961	0.401085	-1.31802
mmu-miR-342-3p	1376	546	0.396802	-1.33351
mmu-miR-379	96	38	0.395833	-1.33703
mmu-miR-132	99	39	0.393939	-1.34395
mmu-miR-212	2539	990	0.389917	-1.35876
mmu-miR-202-3p	98	38	0.387755	-1.36678
mmu-miR-222	106	41	0.386792	-1.37037
mmu-miR-222	106	41	0.386792	-1.37037
mmu-miR-489	184	71	0.38587	-1.37381
mmu-miR-743a	96	37	0.385417	-1.37551
mmu-miR-128a/128b	205	79	0.385366	-1.3757
mmu-miR-212	2438	938	0.384742	-1.37804
mmu-let-7b	6363	2441	0.383624	-1.38223
mmu-miR-7a*	145	55	0.37931	-1.39855
mmu-let-7b	6122	2255	0.368344	-1.44088
mmu-miR-217	106	39	0.367925	-1.44252
mmu-miR-487b	852	313	0.367371	-1.44469
mmu-miR-197	638	234	0.366771	-1.44705
mmu-miR-142-5p	6043	2209	0.365547	-1.45187
mmu-miR-467b	1256	457	0.363854	-1.45857
mmu-miR-490	91	33	0.362637	-1.4634
mmu-miR-127	94	34	0.361702	-1.46713
mmu-miR-128a/128b	197	71	0.360406	-1.4723
miRPlus_17834	92	33	0.358696	-1.47917
mmu-miR-188-3p	162	58	0.358025	-1.48187
mmu-miR-467b	1125	402	0.357333	-1.48466
mmu-miR-181a	157	56	0.356688	-1.48727
mmu-miR-487b	761	271	0.35611	-1.4896
mmu-miR-212	2473	878	0.355034	-1.49397
mmu-miR-487b	758	269	0.354881	-1.49459
mmu-let-7c	15059	5277	0.350422	-1.51284
mmu-miR-188-3p	161	56	0.347826	-1.52356
miRPlus_17653	98	34	0.346939	-1.52725
mmu-miR-128a/128b	181	62	0.342541	-1.54565
mmu-miR-181a	199	68	0.341709	-1.54916
mmu-miR-217	109	37	0.33945	-1.55873
mmu-miR-377	104	35	0.336538	-1.57116
mmu-miR-342-3p	1344	449	0.334077	-1.58175
mmu-miR-197	735	244	0.331973	-1.59086
mmu-miR-467b	1158	384	0.331606	-1.59246
mmu-miR-487b	765	251	0.328105	-1.60777
mmu-miR-200a	92	30	0.326087	-1.61667
mmu-miR-188-3p	122	39	0.319672	-1.64534
mmu-miR-181a	194	62	0.319588	-1.64572
mmu-miR-377	101	32	0.316832	-1.65821
miRPlus_17912	93	29	0.311828	-1.68118
mmu-miR-197	687	211	0.307132	-1.70307
mmu-miR-467b	1127	340	0.301686	-1.72888
mmu-miR-693-5p	98	29	0.295918	-1.75673
miRPlus_17653	102	30	0.294118	-1.76553
mmu-miR-188-3p	212	62	0.292453	-1.77372
mmu-miR-335-3p	103	30	0.291262	-1.77961
mmu-miR-182	94	27	0.287234	-1.7997
miRPlus_17653	101	29	0.287129	-1.80023
mmu-miR-197	769	212	0.275683	-1.85892
mmu-miR-128a/128b	249	63	0.253012	-1.98272
mmu-miR-28	112	28	0.25	-2
mmu-miR-33	112	28	0.25	-2
mmu-miR-496	123	27	0.219512	-2.18763
mmu-miR-150	4465	764	0.171109	-2.54702
mmu-miR-150	4380	687	0.156849	-2.67255
mmu-miR-150	4545	659	0.144994	-2.78593
mmu-miR-150	4439	581	0.130885	-2.93362
